# Supplementary material for: LC-ESI-QTOF-MS/MS Characterization and Estimation of the Antioxidant Potential of Phenolic Compounds from Different Parts of the Lotus (Nelumbo nucifera) Seed and Rhizome
Source: PubMed Central journal article supplement — ACS Omega. 2022 Apr 21;7(17):14630–42. doi: 10.1021/acsomega.1c07018 (PMC9088796; doi:10.1021/acsomega.1c07018), 2022-04-21
Supplement: ao1c07018_si_001.pdf [file ao1c07018_si_001.pdf]

**LC-ESI-QTOF-MS/MS characterization and estimation of antioxidant potential of phenolic compounds from different parts of lotus (*Nelumbo Nucifera*) seed and rhizome**

Zihan Zhu<sup>1</sup>, Biming Zhong<sup>1,2</sup>, Zihong Yang<sup>1</sup>, Wanrong Zhao<sup>1</sup>, Linghong Shi<sup>1</sup>, Ahsan Aziz<sup>1</sup>, Abdur Rauf<sup>3\*</sup>, Abdullah S.M. Aljohani<sup>4</sup>, Fahad A. Alhumaydhi<sup>5</sup> and Hafiz Ansar Rasul Suleria<sup>1\*</sup>

<sup>1</sup>School of Agriculture and Food, Faculty of Veterinary and Agricultural Sciences, The University of Melbourne, Parkville, VIC 3010, Australia

<sup>2</sup>CAS Key Laboratory of Quantitative Engineering Biology, Synthetic Biochemistry Center, Shenzhen Institute of Synthetic Biology, Shenzhen Institute of Advanced Technology, Chinese Academy of Sciences, Shenzhen 518055, China

<sup>3</sup>Department of Chemistry, University of Swabi, Swabi, Anbar-23561 KPK, Pakistan

<sup>4</sup>*Department of Veterinary Medicine, College of Agriculture and Veterinary Medicine, Qassim University, Buraydah, Saudi Arabia*

<sup>5</sup>*Department of Medical Laboratories, College of Applied Medical Sciences, Qassim University, Buraydah, Saudi Arabia*

**Corresponding authors: Hafiz A.R. Suleria** - School of Agriculture and Food, Faculty of Veterinary and Agricultural Sciences, The University of Melbourne, Parkville, VIC 3010, Australia; ORCID: 0000-0002-2450-0830; [hafiz.suleria@unimelb.edu.au](mailto:hafiz.suleria@unimelb.edu.au) ; **Abdur Rauf**; Department of Chemistry, University of Swabi, Swabi, Anbar-23561 KPK, Pakistan; Email: [abdurrauf@uoswabi.edu.pk](mailto:abdurrauf@uoswabi.edu.pk)

(a)

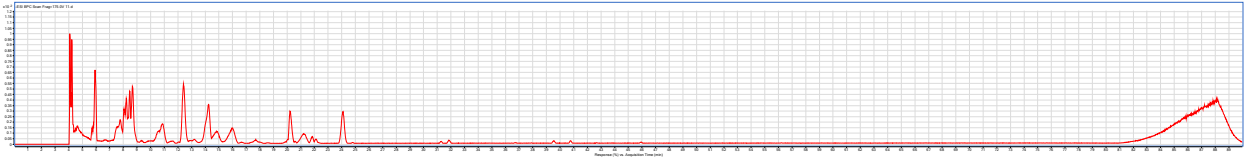

(b)

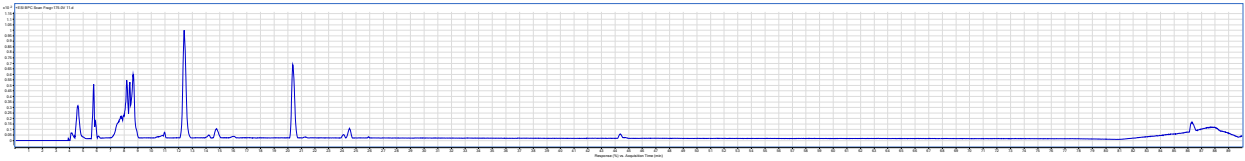

(c)

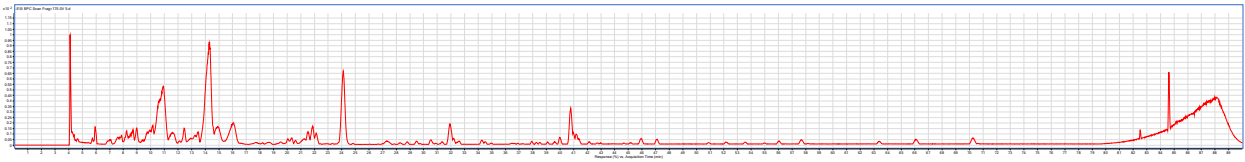

(d)

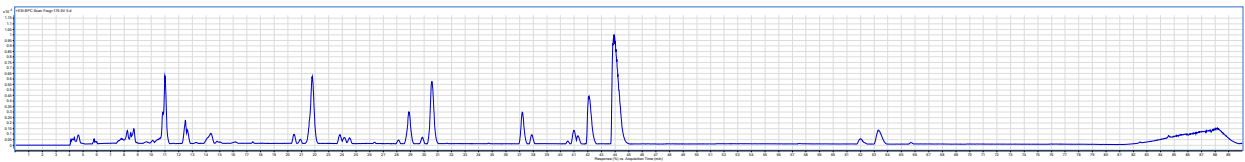

(e)

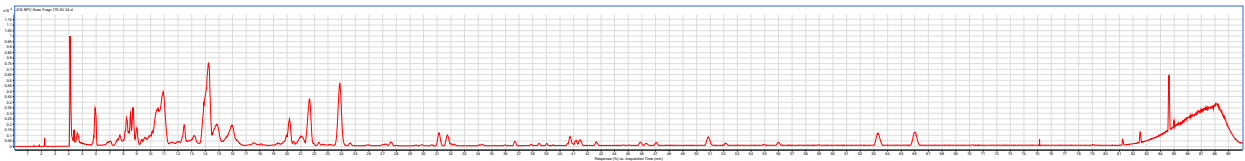

(f)

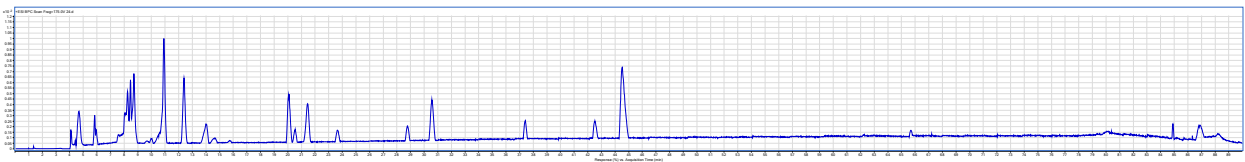

(g)

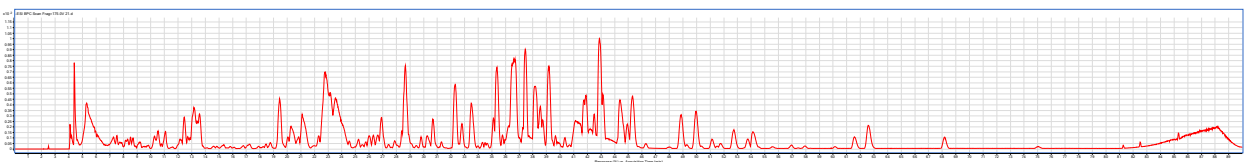

**(h)**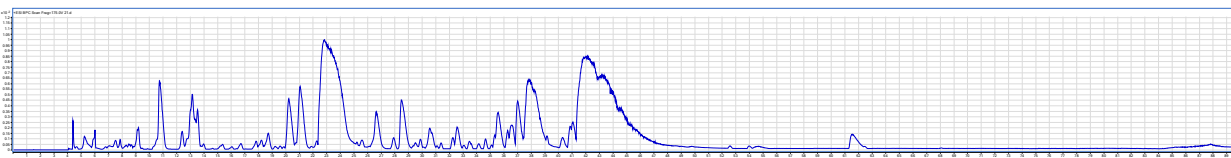**(i)**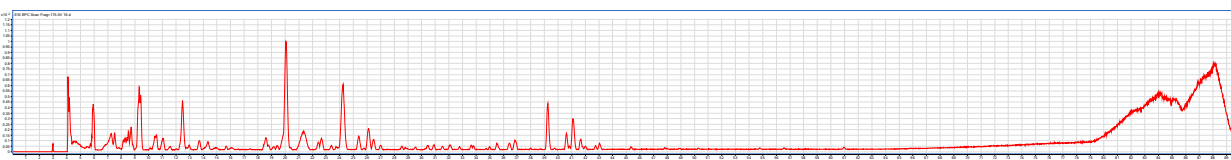**(j)**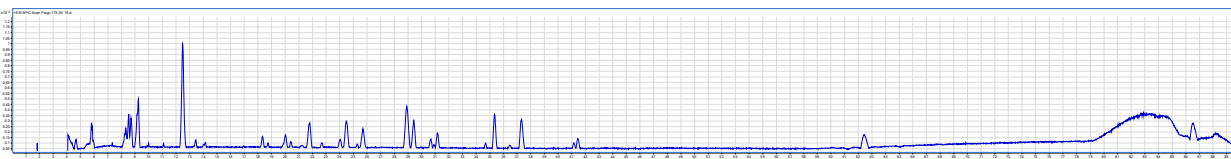

**Figure S1:** LC-ESI-QTOF-MS/MS basic peak chromatograph (BPC) for characterization of phenolic compounds of Australian grown lotus; **(a)** The pulp of lotus rhizome in negative ionization mode; **(b)** The pulp of lotus rhizome in positive ionization mode; **(c)** The peel of lotus rhizome in negative ionization mode; **(d)** The peel of lotus rhizome in positive ionization mode; **(e)** The knot of lotus rhizome in negative ionization mode; **(f)** The knot of lotus rhizome in positive ionization mode; **(g)** The embryo of lotus seed in negative ionization mode; **(h)** The embryo of lotus seed in positive ionization mode; **(i)** The cotyledon of lotus seed in negative ionization mode; **(j)** The cotyledon of lotus seed in positive ionization mode.

(a)

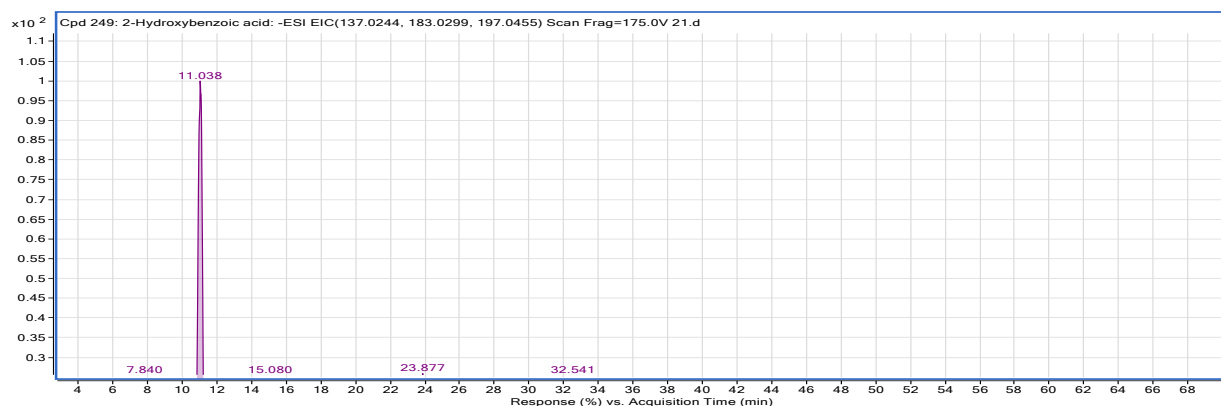

(b)

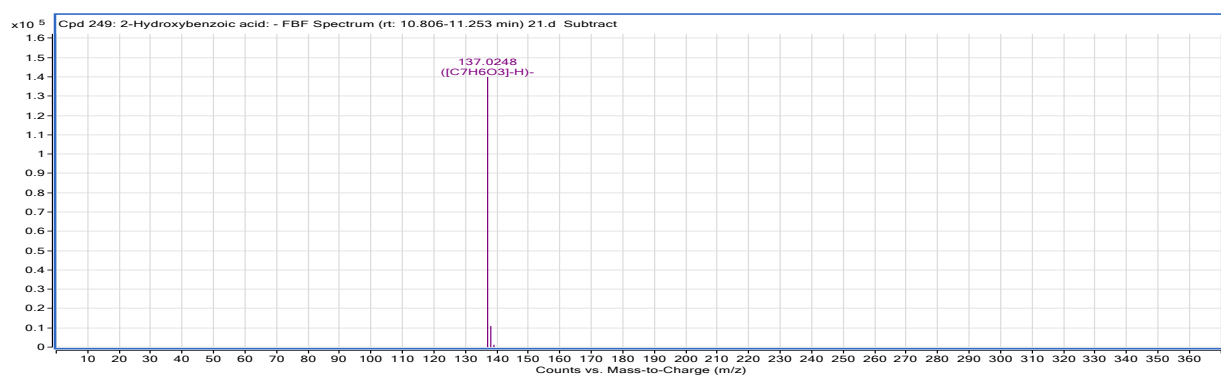

(c)

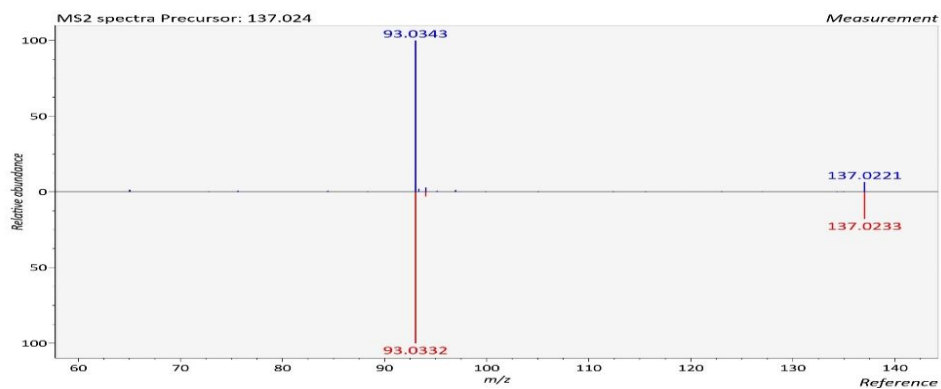

**Figure S2.** The LC-ESI-QTOF-MS/MS characterization of 2-hydroxybenzoic acid; (a) A chromatograph of 2-hydroxybenzoic acid (Compound 2, Table 3), in the negative mode of ionization  $[M - H]^-$  identified in all five lotus samples including lotus seed embryo (LSE); (b) Mass spectra of 2-hydroxybenzoic acid with observed/precursor of  $m/z$  137.0248; (c) MS / MS spectrum of 2-hydroxybenzoic acid reflecting the product ion of  $m/z$  93, confirmation via online LC-MS library and database. Fragmentation of 2-hydroxybenzoic acid in negative mode  $[M - H]^-$ , with precursor of  $m/z$  137, showing product ion of  $m/z$  93 due to the loss of a  $CO_2$  (44 Da).
